# Supplementary material for: Characterization, oxidative desulfurization performance evaluation and the catalytic reaction mechanism of polyoxometalate-coated, semi-encapsulated heart-shaped metal organic frameworks
Source: Royal Society of Chemistry journal article supplement (doi:10.1039/d4ta05268d), 2024-01-01
Supplement: d4ta05268d1.pdf [file d4ta05268d1.pdf]

## Supplementary material

### Characterization, oxidative desulfurization performance evaluation and catalytic reaction mechanism of polyoxometalate-coated, semi-encapsulated heart-shaped metal organic frameworks

Zhengxiang Sun,<sup>a</sup> Rui Wang,<sup>\*a</sup>

<sup>a</sup> School of Environmental Science and Engineering, Shandong University, No.27 Shanda South Road, Jinan 250199, PR China. \*E-mail: wangrui@sdu.edu.cn (R. Wang).

#### 1. Figures

**Fig. S1.** SEM image of H-POMOF, where the H-POMOF complex with a distinct semi-encapsulated style is labelled within the yellow dashed circle.

**Fig. S2.** TEM image of H-POMOF from 1  $\mu\text{m}$  to 200 nm.

**Fig. S3.** SEM mapping of P, W, C and O elements of H-POMOF.

**Fig. S4.** Delamination occurred when the medium was left to stand at the end of the ODS reaction.

**Fig. S5.** (a) BET Surface Area Plot, (b) Langmuir Surface Area Plot and (c) t-Plot (Harkins and Jura) of H-POMOF.

**Fig. S6.** Illustrations of the heart-shaped MOF (H-MOF) from different perspectives after DFT structure optimization.

**Fig. S7.** Front view and van der Waals spheres morphology of the heart-shaped MOF (H-MOF) after DFT structure optimization.

**Fig. S8.** The label diagram, Polygon diagram, Ring diagram, and Van der Waals Spheres diagram of POM.

**Fig. S9.** Illustration of the (a) LUMO and (b) HOMO of POM.

**Fig. S10.** EDX spectrum analysis of H-POMOF composite material.

**Fig. S11.** Schematic diagram of electron transfer and metal oxidation state in the ODS catalytic reaction of H-POMOF.

#### 2. Tables

**Table S1** Elemental composition and atomic mass obtained by SEM mapping.

**Table S2** Mesoporous BET related parameters of H-POMOF.

**Table S3** Energy values and changes from the initial state (POM,  $\text{H}_2\text{O}_2$ ) to the transition state (POM- $\text{H}_2\text{O}_2$ ) to the final state (POM-OH).

**Table S4** Representative synthetic strategies and characteristics of POMOF-based materials.

**Table S5** Comparison of oxidative desulphurisation performance of recently reported representative POMOF matrix composites.

**Table S6** Langmuir adsorption isotherm parameters at 50°C.

**Table S7** Langmuir adsorption isotherm parameters at 60°C.

**Table S8** Langmuir adsorption isotherm parameters at 70°C.

**Table S9** Adsorption thermodynamic parameters at 50°C.

**Table S10** Adsorption thermodynamic parameters at 60°C.

**Table S11** Adsorption thermodynamic parameters at 70°C.

**Table S12** Cartesian Coordinates (A.U.) of POM by DFT.

**Table S13** Mayer Population Analysis of POM by DFT.

#### 3. References

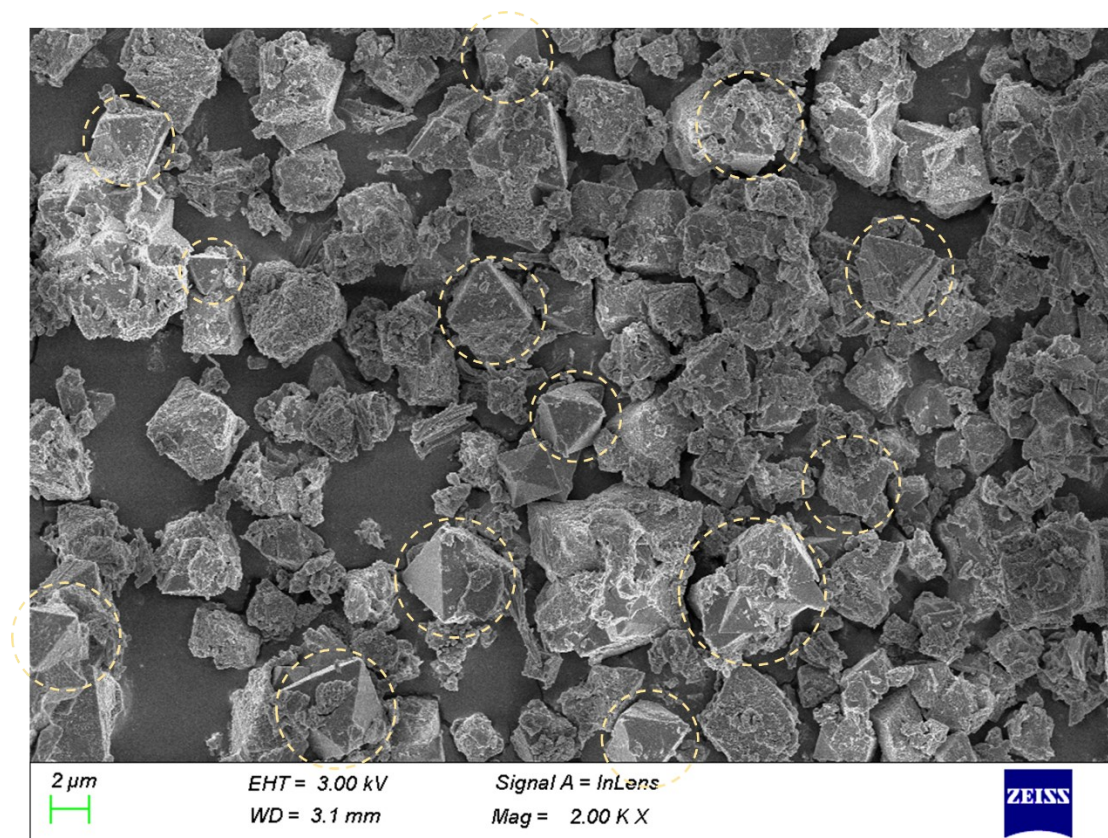

**Fig. S1.** SEM image of H-POMOF, where the H-POMOF complex with a distinct semi-encapsulated style is labelled within the yellow dashed circle.

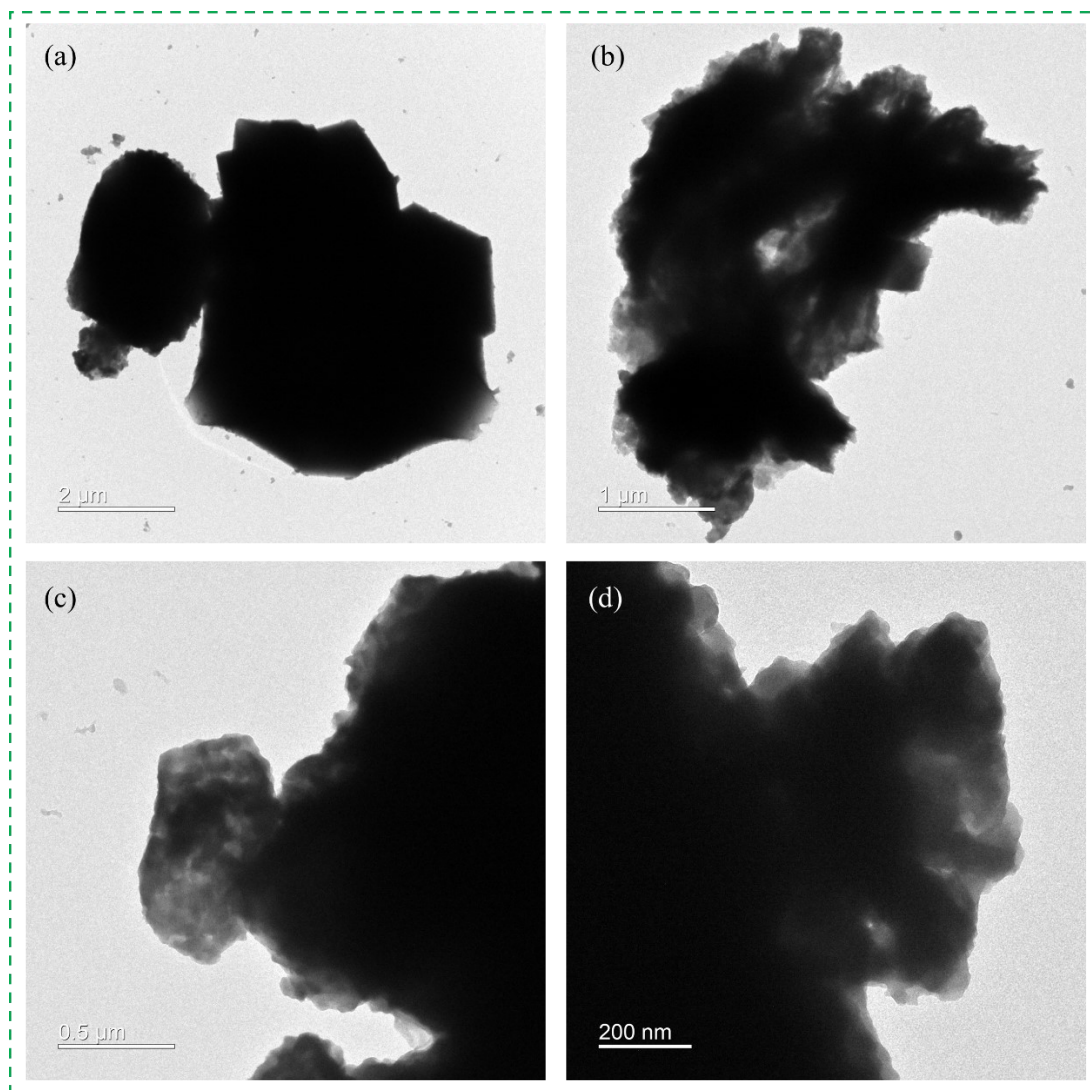

**Fig. S2.** TEM image of H-POMOF from 1  $\mu\text{m}$  to 200 nm.

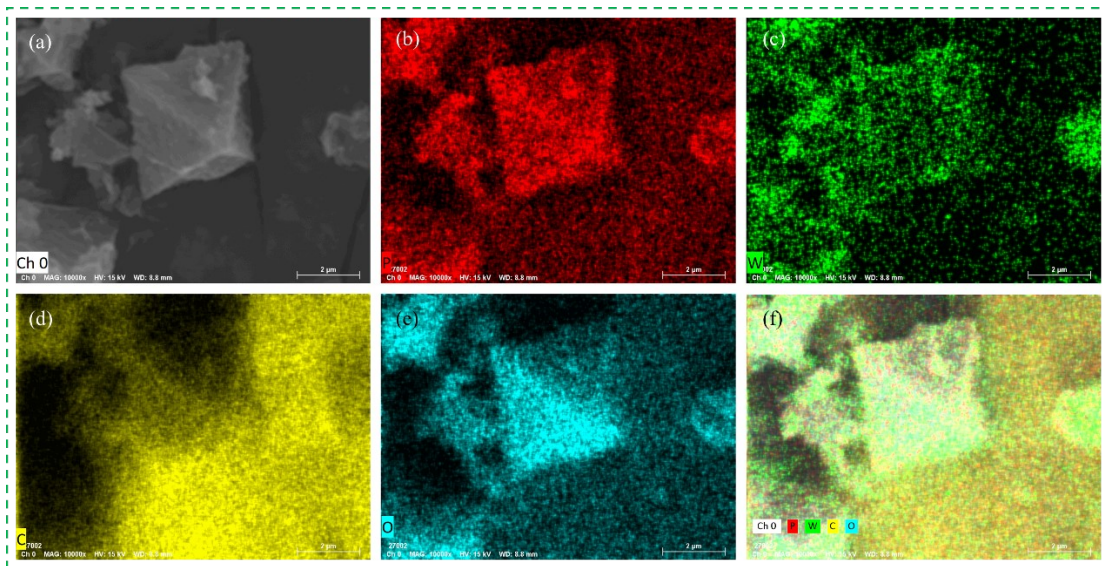

**Fig. S3.** SEM mapping of P, W, C and O elements of H-POMOF.

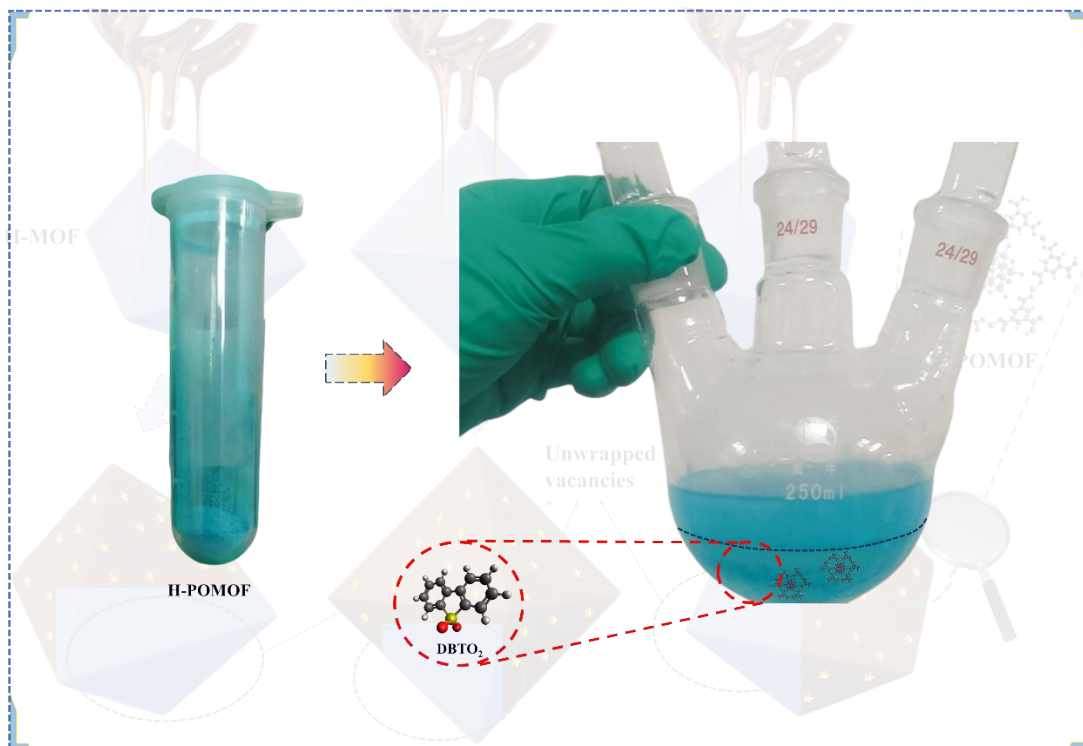

**Fig. S4.** Delamination occurred when the medium was left to stand at the end of the ODS reaction.



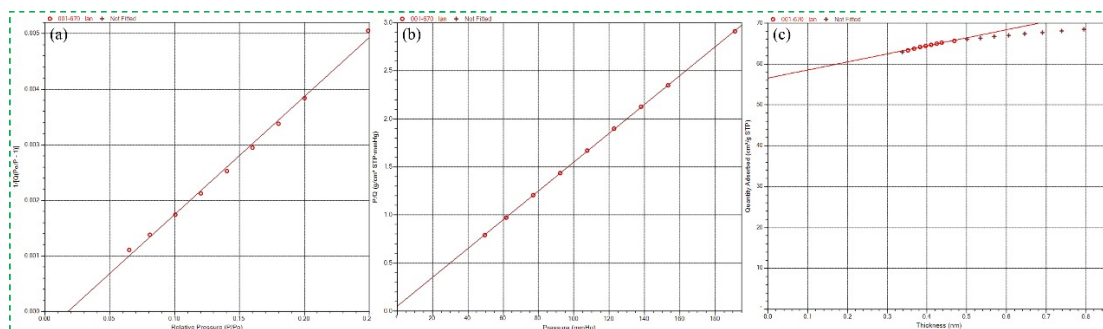

**Fig. S5.** (a) BET Surface Area Plot, (b) Langmuir Surface Area Plot and (c) t-Plot (Harkins and Jura) of H-POMOF.

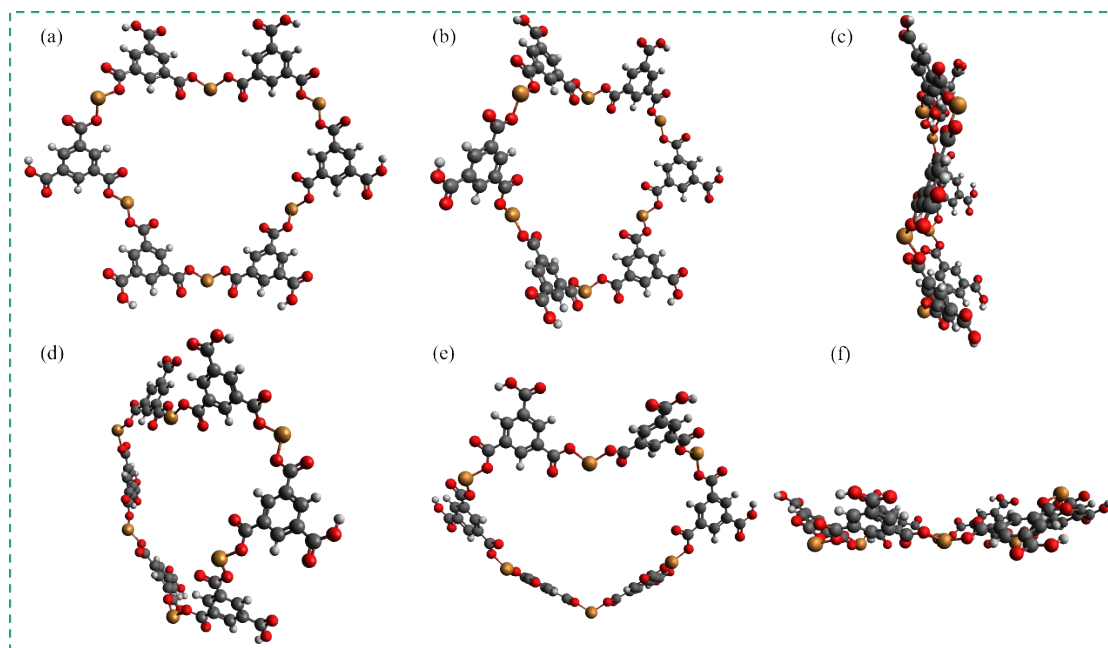

**Fig. S6.** Illustrations of the heart-shaped MOF (H-MOF) from different perspectives after DFT structure optimization.

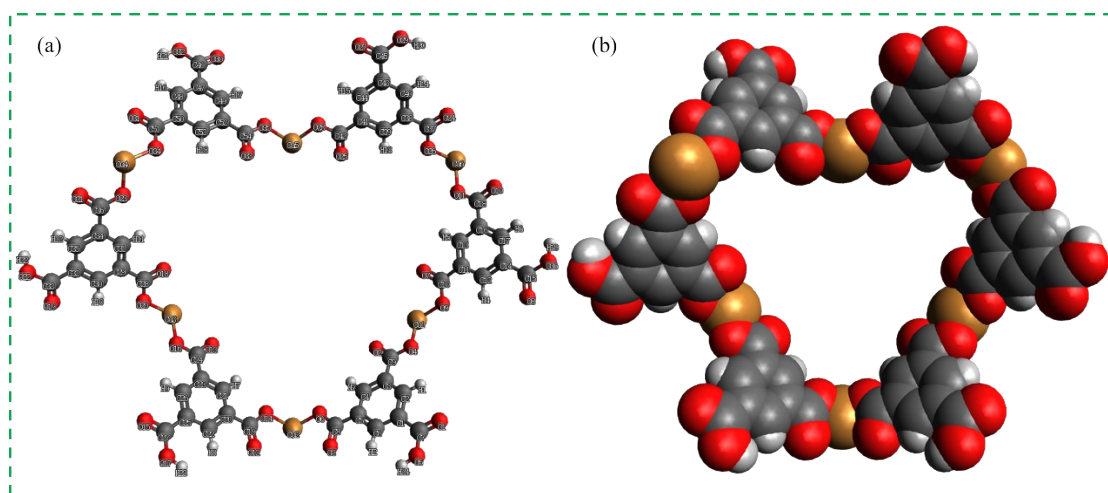

**Fig. S7.** Front view and van der Waals spheres morphology of the heart-shaped MOF (H-MOF) after DFT structure optimization.

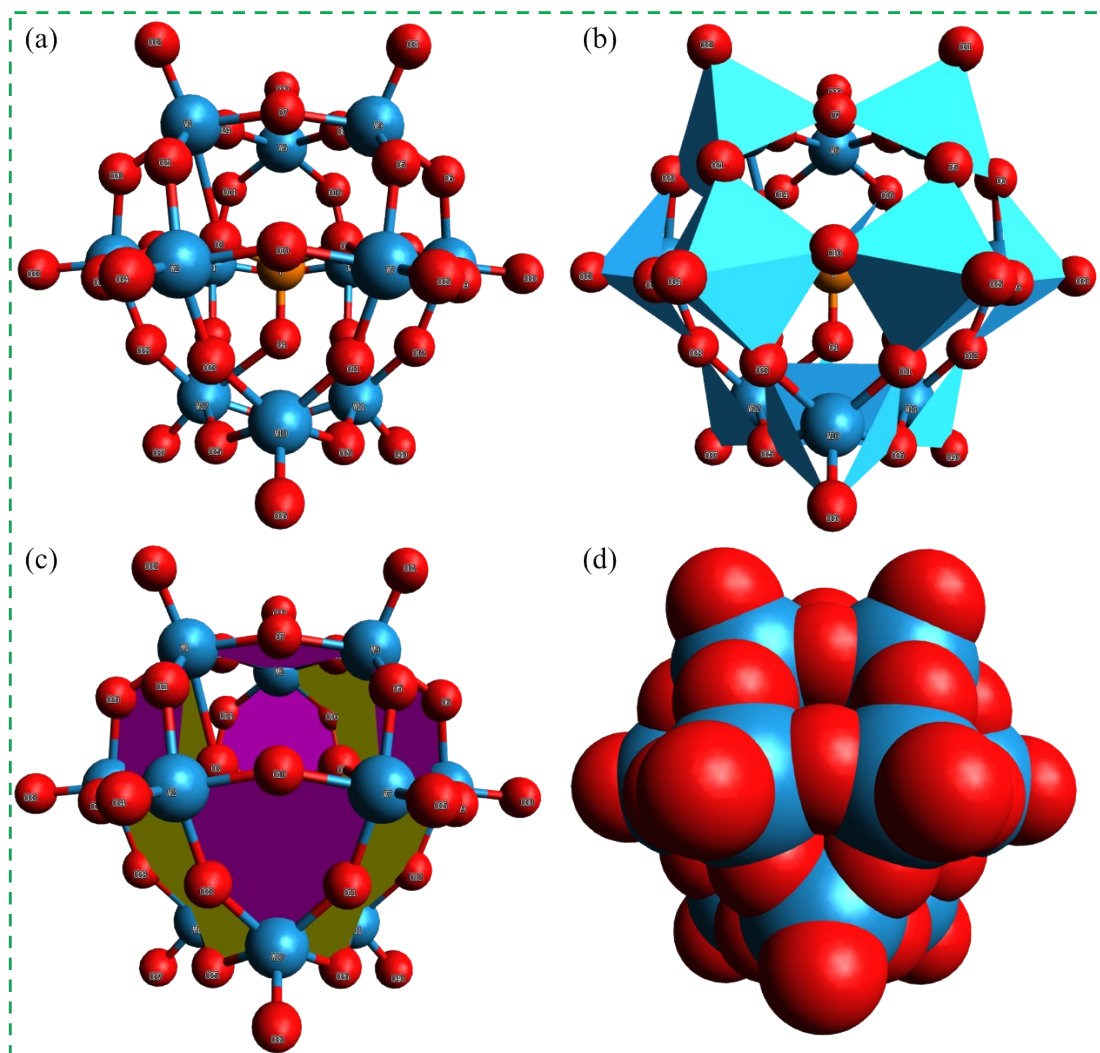

**Fig. S8.** The label diagram, Polygon diagram, Ring diagram, and Van der Waals Spheres diagram of POM.

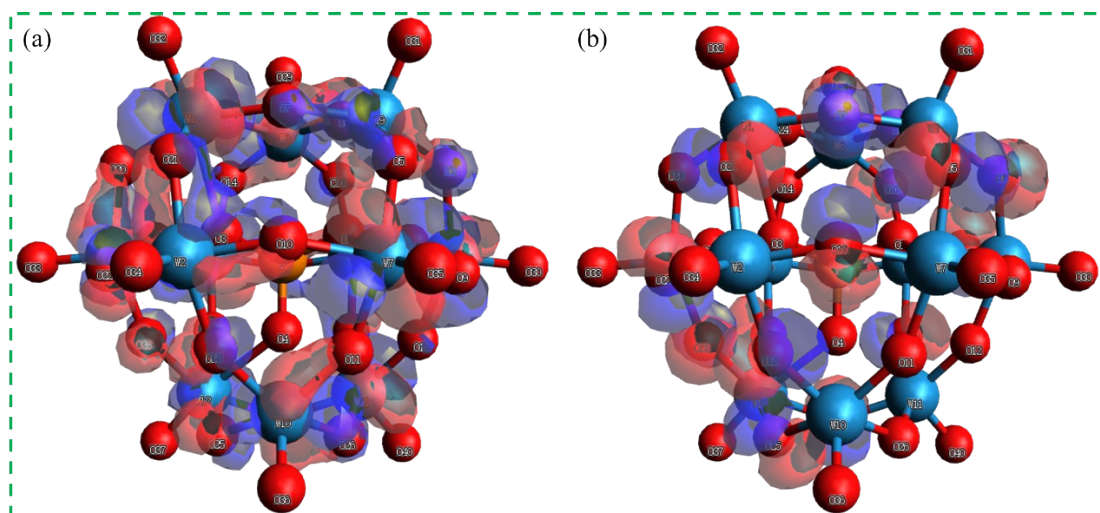

**Fig. S9.** Illustration of the (a) LUMO and (b) HOMO of POM.



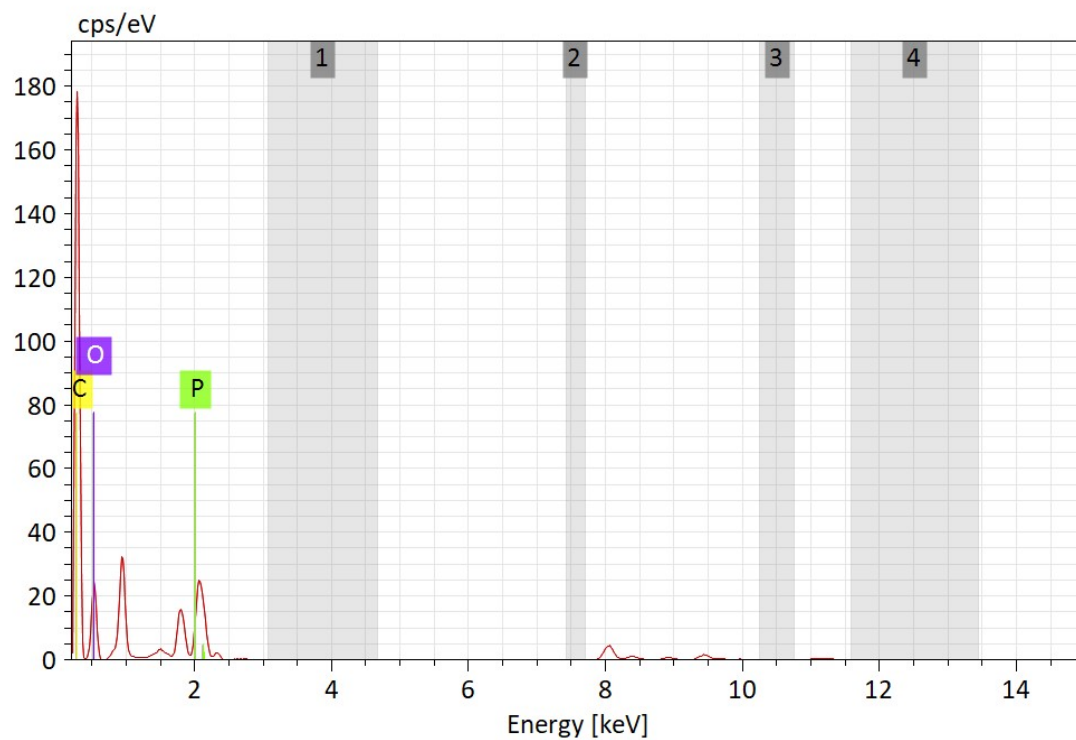

**Fig. S10** EDX spectrum analysis of H-POMOF composite material.

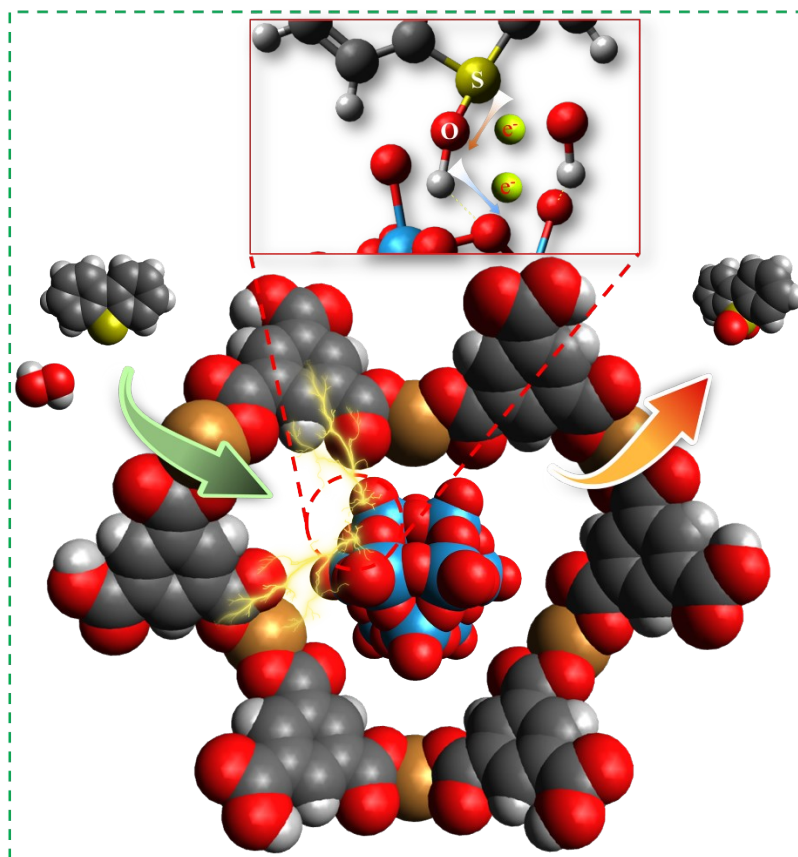

**Fig. S11** Schematic diagram of electron transfer and metal oxidation state in the ODS catalytic reaction of H-POMOF.

**Table S1** Elemental composition and atomic mass obtained by SEM mapping.

| Elements | Atomic number | net worth | Mass (%) | Normalized quality | Atom   | Abs. error (%) | Abs. error (%) (3 sigma) | rel. error (%) (3 sigma) |
|----------|---------------|-----------|----------|--------------------|--------|----------------|--------------------------|--------------------------|
| C        | 6             | 362611    | 29.50    | 71.54              | 82.02  | 3.15           | 9.44                     | 31.99                    |
| O        | 8             | 53057     | 7.54     | 18.29              | 15.74  | 0.89           | 2.66                     | 35.21                    |
| P        | 15            | 57935     | 1.65     | 3.99               | 1.78   | 0.06           | 0.19                     | 11.49                    |
| W        | 74            | 4545      | 2.55     | 6.18               | 0.46   | 0.10           | 0.30                     | 11.70                    |
| Total    |               |           | 41.24    | 100.00             | 100.00 |                |                          |                          |

**Table S2** Mesoporous BET related parameters of H-POMOF.

| Surface Area                                         |                            | Pore Volume                               |                             | Pore Size                            |           |
|------------------------------------------------------|----------------------------|-------------------------------------------|-----------------------------|--------------------------------------|-----------|
| Single point surface area at $P/P_0 = 0.24929862$ 4: | 214.5538 m <sup>2</sup> /g | Single point adsorption total pore volume | 0.125631 cm <sup>3</sup> /g | Adsorption average pore diameter     | 2.4065 nm |
| BET Surface Area:                                    | 208.8232 m <sup>2</sup> /g | t-Plot micropore volume                   | 0.132558 cm <sup>3</sup> /g | Desorption average pore diameter     | 2.5391 nm |
| Langmuir Surface Area:                               | 290.1607 m <sup>2</sup> /g | BJH Adsorption cumulative volume          | 0.048298 cm <sup>3</sup> /g | BJH Adsorption average pore diameter | 9.4722 nm |

**Table S3** Energy values and changes from the initial state (POM, H<sub>2</sub>O<sub>2</sub>) to the transition state (POM-H<sub>2</sub>O<sub>2</sub>) to the final state (POM-OH).

| State                               | Final single point energy (Hartree) | $\Delta$ Energy (Hartree) | $\Delta E$ (kcal/mol) |
|-------------------------------------|-------------------------------------|---------------------------|-----------------------|
| POM · H <sub>2</sub> O <sub>2</sub> | -4309.4716                          | 0                         | 0                     |
| POM-H <sub>2</sub> O <sub>2</sub>   | -4309.1159                          | 0.3557                    | 223.2                 |
| POM-OH                              | -4309.499                           | -0.3831                   | -240.4                |

**Table S4** Representative synthetic strategies and characteristics of POMOF-based materials.

| POMOFs                                                              | POM                                          | MOF                     | Diameter of porous cage (Å) | Organic ligands (linkers)             | Synthetic methods      | Application                            | Ref.      |
|---------------------------------------------------------------------|----------------------------------------------|-------------------------|-----------------------------|---------------------------------------|------------------------|----------------------------------------|-----------|
| POM@ZIF-67                                                          | $H_3PW_{12}O_{40} \cdot 18H_2O$              | ZIF-67                  | 11.6                        | 2-methylimidazole                     | Encapsulation          | Photocatalytic water splitting         | 1         |
| $(CH_3NH_2CH_3)[Cu_2(TPB)_2(PW_{12}O_{40})] \cdot 4DMF \cdot 6H_2O$ | $H_3PW_{12}O_{40}$                           | –                       | 12                          | 1,2,4,5-tetra(4-pyridyl)benzene (TPB) | Encapsulation          | Dye adsorption                         | 2         |
| POM@MOF@SBA-15                                                      | $H_4[PMo_9V_3O_{40}] \cdot xH_2O$            | MOF-199                 | –                           | 1,3,5-trihydroxybenzene (BTC)         | Encapsulation          | Hydroxylation of benzene               | 3         |
| POM@MIL101(Cr)                                                      | $H_3PW_{12}O_{40} \cdot xH_2O$               | MIL101(Cr)              | 12~16                       | Terephthalate                         | Bottle-around-shipping | Esterification reaction                | 4         |
| $Pd_{13}Se_8@MIL-101$                                               | $[Pd_{13}Se_8O_{32}]^{6-} (Pd_{13}Se^-)$     | MIL-101                 | 12~16                       | –                                     | Impregnation           | Suzuki–Miyaura cross-coupling reaction | 5         |
| SRL-POM@MOF-199@MCM-41                                              | $H_3PMo_6W_6O_{40}$                          | MOF-199 and MCM-41      | –                           | 1,3,5-benzenetricarboxylic (BTC)      | Impregnation           | Oxidative desulfurization              | 6         |
| $PMoV_2@MIL-101$                                                    | $PMoV_2$                                     | MIL-101                 | 12~16                       | Terephthalic acid                     | Encapsulation          | Aerobic Iodination of Arenes           | 7         |
| ZZULI-1                                                             | $[W_{12}O_{40}]^{8-}$ and $[W_6O_{19}]^{2-}$ | $Cu^{I}_2X_{2-bas edM}$ | 10                          | 1,2,4,5-tetra(4-pyridyl)benzene (TPB) | Immobilization         | Photocatalytic water splitting         | 8         |
| $CoW_{12}@ZIF-8$                                                    | $K_6[CoW_{12}O_{40}] \cdot 6H_2O$            | ZIF-8                   | –                           | 2-methylimidazole                     | Encapsulation          | Hydrogen evolution reaction            | 9         |
| $Co_3O_4/CoMoO_4$                                                   | $H_3PMo_12O_{40} \cdot nH_2O$                | ZIF-67                  | 11.6                        | 2-methylimidazole                     | Encapsulation          | Hydrogen evolution reaction            | 10        |
| H-POMOF                                                             | $H_3PW_{12}O_{40} \cdot xH_2O$               | H-MOF                   | 15.1~16.5                   | Benzene-1,3,5-tricarboxylic acid      | Semi-encapsulation     | Oxidative desulfurization (ODS)        | This work |



**Table S5** Comparison of oxidative desulphurisation performance of recently reported representative POMOF matrix composites.

| Catalyst                                        | <i>n</i> (catalyst) | Sulfur compound | Conc. (ppm) | Oxidant                       | O / S | T (°C) | Time (min) | Conv. (%) | Ref.      |
|-------------------------------------------------|---------------------|-----------------|-------------|-------------------------------|-------|--------|------------|-----------|-----------|
| PMo <sub>12</sub> @NH <sub>2</sub> -MIL-101(Cr) | 4 mol/L             | Real diesel     | 2300        | H <sub>2</sub> O <sub>2</sub> | 6     | 50     | 120        | 80        | 11        |
| ZIF-8@{Mo <sub>13</sub> } <sub>2</sub>          | 0.15 g/L            | DBT             | 500         | TBHP                          | 1     | 80     | 720        | 92        | 12        |
| Mo <sub>11</sub> V <sub>1</sub>                 | 12 g/L              | DBT             | 1000        | H <sub>2</sub> O <sub>2</sub> | 1/2   | 70     | 50         | 90        | 13        |
| Mo <sub>10</sub> V <sub>2</sub>                 | 12 g/L              | DBT             | 1000        | H <sub>2</sub> O <sub>2</sub> | 1/2   | 70     | 50         | 92        | 13        |
| HPA@MOF@CA-3                                    | 1.8 g/L             | Thiophene       | 1000        | O <sub>2</sub>                |       | 25     | 180        | 84.91     | 14        |
| HPA@MOF@CA-4                                    | 1.8 g/L             | Thiophene       | 1000        | O <sub>2</sub>                |       | 25     | 180        | 93.24     | 14        |
| PTA@UiO-66                                      | 0.6mol %            | BT              | 950         | H <sub>2</sub> O <sub>2</sub> | 4     | 70     | 60         | 94.8      | 15        |
| PTA@MIL-100(Fe)                                 | 0.6mol %            | 4,6-DMDBT       | 950         | H <sub>2</sub> O <sub>2</sub> | 4     | 70     | 60         | 92.8      | 15        |
| POM-PAF-1                                       | 8 g/L               | DBT             | 500         | H <sub>2</sub> O <sub>2</sub> | 6     | 30     | 30         | 98.5      | 16        |
| SRL-1-POM@MOF-199@MCM-41                        | 1.0 g/L             | DBT             | 2000        | O <sub>2</sub>                |       | 60     | 150        | 87.3      | 6         |
| SRL-2-POM@MOF-199@MCM-41                        | 1.0 g/L             | DBT             | 2000        | O <sub>2</sub>                |       | 60     | 150        | 92.8      | 6         |
| SRL-4-POM@MOF-199@MCM-41                        | 1.0 g/L             | DBT             | 2000        | O <sub>2</sub>                |       | 60     | 150        | 90.5      | 6         |
| Fe <sub>3</sub> O <sub>4</sub> @UiO-66-PMoW     | 0.5 g/L             | DBT             | 2000        | O <sub>2</sub>                |       | 60     | 75         | 91.6      | 17        |
| H-POMOF                                         | 3.5 g/L             | DBT             | 500         | H <sub>2</sub> O <sub>2</sub> | 5     | 60     | 150        | 98        | This work |

**Table S6** Langmuir adsorption isotherm parameters at 50°C.

| $C_a$ | $C_0$ | $C_t$ | $C_T$ | $C_e$ | $C_E$  | $q_e$  | $C_e/q_e$    |
|-------|-------|-------|-------|-------|--------|--------|--------------|
| 3.5   | 250   | 7.4   | 5.18  | 242.6 | 169.82 | 48.52  | 0.10676      |
|       | 500   | 37    | 25.9  | 463   | 324.1  | 92.6   | 0.27969<br>8 |
|       | 750   | 98.6  | 69.02 | 651.4 | 455.98 | 130.28 | 0.52978<br>2 |
|       | 1000  | 338   | 236.6 | 662   | 463.4  | 132.4  | 1.78700<br>9 |

**Table S7** Langmuir adsorption isotherm parameters at 60°C.

| $C_a$ | $C_0$ | $C_t$ | $C_T$  | $C_e$  | $C_E$   | $q_e$  | $C_e/q_e$    |
|-------|-------|-------|--------|--------|---------|--------|--------------|
| 3.5   | 250   | 6.75  | 4.725  | 243.25 | 170.275 | 48.65  | 0.09712<br>2 |
|       | 500   | 10    | 7      | 490    | 343     | 98     | 0.07142<br>9 |
|       | 750   | 65.25 | 45.675 | 684.75 | 479.325 | 136.95 | 0.33351<br>6 |
|       | 1000  | 303   | 212.1  | 697    | 487.9   | 139.4  | 1.52152<br>1 |

**Table S8** Langmuir adsorption isotherm parameters at 70°C.

| $C_a$ | $C_0$ | $C_t$ | $C_T$ | $C_e$ | $C_E$  | $q_e$  | $C_e/q_e$    |
|-------|-------|-------|-------|-------|--------|--------|--------------|
| 3.5   | 250   | 7.1   | 4.97  | 242.9 | 170.03 | 48.58  | 0.10230<br>5 |
|       | 500   | 11    | 7.7   | 489   | 342.3  | 97.8   | 0.07873<br>2 |
|       | 750   | 82.4  | 57.68 | 667.6 | 467.32 | 133.52 | 0.43199<br>5 |
|       | 1000  | 322   | 225.4 | 678   | 474.6  | 135.6  | 1.66224<br>2 |

$C_a$ —Adsorbent concentration (g/L)

$C_0$ —Initial sulfide concentration (ppm)

$C_t$ —Equilibrium concentration (ppm)

$C_T$ —Equilibrium concentration (mg/L)

$C_e$ —Adsorbed concentration (ppm)

$C_E$ —Adsorbed concentration (mg/L)

$q_e$ —Adsorbent unit adsorption capacity (mg/g)

**Table S9** Adsorption thermodynamic parameters at 50°C.

| $C_e$ (mg/L) | $K_d=q_e/C_e$ | $\ln K_d$ | $\Delta G$ (J/mol) |
|--------------|---------------|-----------|--------------------|
| 5.18         | 9.366795367   | 2.237171  | -4778.17           |
| 25.9         | 3.575289575   | 1.274046  |                    |
| 69.02        | 1.887568821   | 0.63529   |                    |
| 236.6        | 0.559594252   | -0.58054  |                    |

**Table S10** Adsorption thermodynamic parameters at 60°C.

| $C_e$ (mg/L) | $K_d=q_e/C_e$ | $\ln K_d$ | $\Delta G$ (J/mol) |
|--------------|---------------|-----------|--------------------|
| 4.725        | 10.2962963    | 2.331784  | -6419.741566       |
| 7            | 14            | 2.639057  |                    |
| 45.675       | 2.998357964   | 1.098065  |                    |
| 212.1        | 0.657237152   | -0.41971  |                    |

**Table S11** Adsorption thermodynamic parameters at 70°C.

| $C_e$ (mg/L) | $K_d=q_e/C_e$ | $\ln K_d$ | $\Delta G$ (J/mol) |
|--------------|---------------|-----------|--------------------|
| 4.97         | 9.774647887   | 2.279792  | -6386.1            |
| 7.7          | 12.7012987    | 2.541704  |                    |
| 57.68        | 2.314840499   | 0.839341  |                    |
| 225.4        | 0.601597161   | -0.50817  |                    |

**Table S12** Cartesian Coordinates (A.U.) of POM by DFT.

| NO | LB | ZA       | FRAG | MASS   | X         | Y         | Z         |
|----|----|----------|------|--------|-----------|-----------|-----------|
| 0  | P  | 15.0000  | 0    | 30.974 | 2.253757  | -0.972047 | -2.458035 |
| 1  | O  | 8.0000   | 0    | 15.999 | -0.581771 | -1.550797 | -3.132544 |
| 2  | O  | 8.0000   | 0    | 15.999 | 3.671425  | -3.514408 | -1.857107 |
| 3  | O  | 8.0000   | 0    | 15.999 | 2.361763  | 0.803755  | -0.077468 |
| 4  | O  | 8.0000   | 0    | 15.999 | 3.565273  | 0.372731  | -4.761686 |
| 5  | W  | 14.0000* | 0    | 183.85 | 0.624262  | -0.185108 | 4.150262  |
| 6  | W  | 14.0000* | 0    | 183.85 | 0.475777  | 5.094995  | 0.194926  |
| 7  | W  | 14.0000* | 0    | 183.85 | 6.256770  | 2.430787  | 1.937837  |
| 8  | W  | 14.0000* | 0    | 183.85 | 8.187925  | -3.896399 | -0.658733 |
| 9  | W  | 14.0000* | 0    | 183.85 | 4.184969  | -7.119554 | -4.798246 |
| 10 | W  | 14.0000* | 0    | 183.85 | 2.553910  | -6.515510 | 1.560741  |
| 11 | W  | 14.0000* | 0    | 183.85 | -3.826011 | 1.615472  | -4.264548 |
| 12 | W  | 14.0000* | 0    | 183.85 | -2.042799 | -4.258174 | -6.675810 |
| 13 | W  | 14.0000* | 0    | 183.85 | -3.679378 | -3.660892 | -0.309437 |
| 14 | W  | 14.0000* | 0    | 183.85 | 2.241268  | 4.442165  | -6.657478 |
| 15 | W  | 14.0000* | 0    | 183.85 | 4.028446  | -1.435701 | -9.061506 |
| 16 | W  | 14.0000* | 0    | 183.85 | 8.022669  | 1.788864  | -4.917272 |
| 17 | O  | 8.0000   | 0    | 15.999 | -5.252176 | -0.702595 | -1.805565 |
| 18 | O  | 8.0000   | 0    | 15.999 | -3.888297 | -5.178724 | -3.643854 |
| 19 | O  | 8.0000   | 0    | 15.999 | -2.216481 | -1.506930 | 2.259613  |
| 20 | O  | 8.0000   | 0    | 15.999 | -0.875297 | -5.873343 | 0.458507  |
| 21 | O  | 8.0000   | 0    | 15.999 | -3.999235 | -1.157346 | -6.657692 |
| 22 | O  | 8.0000   | 0    | 15.999 | -2.349909 | 3.536422  | -1.523261 |
| 23 | O  | 8.0000   | 0    | 15.999 | -1.131582 | 3.087447  | -6.257065 |
| 24 | O  | 8.0000   | 0    | 15.999 | 0.573870  | -2.527285 | -8.556037 |
| 25 | O  | 8.0000   | 0    | 15.999 | 0.681488  | -6.455440 | -5.611757 |
| 26 | O  | 8.0000   | 0    | 15.999 | 6.174022  | -5.944366 | 1.627430  |
| 27 | O  | 8.0000   | 0    | 15.999 | 7.418415  | -6.405438 | -3.221107 |
| 28 | O  | 8.0000   | 0    | 15.999 | 3.124572  | -8.406023 | -1.530533 |
| 29 | O  | 8.0000   | 0    | 15.999 | 7.488614  | -0.978424 | 1.435587  |

|    |   |        |   |        |               |           |            |
|----|---|--------|---|--------|---------------|-----------|------------|
| 30 | O | 8.0000 | 0 | 15.999 | 8.689687      | -1.426749 | -3.303796  |
| 31 | O | 8.0000 | 0 | 15.999 | 4.873273      | -4.501213 | -7.256893  |
| 32 | O | 8.0000 | 0 | 15.999 | 4.004642      | 1.183628  | 4.547336   |
| 33 | O | 8.0000 | 0 | 15.999 | -0.402769     | 3.210816  | 3.217267   |
| 34 | O | 8.0000 | 0 | 15.999 | 3.891051      | 5.204810  | 1.527406   |
| 35 | O | 8.0000 | 0 | 15.999 | 1.845875      | 5.484034  | -3.172827  |
| 36 | O | 8.0000 | 0 | 15.999 | 2.091792      | -3.480546 | 3.551415   |
| 37 | O | 8.0000 | 0 | 15.999 | 5.881030      | 4.479748  | -6.191961  |
| 38 | O | 8.0000 | 0 | 15.999 | 2.834073      | 2.020403  | -9.346967  |
| 39 | O | 8.0000 | 0 | 15.999 | 7.241656      | -0.003831 | -8.021172  |
| 40 | O | 8.0000 | 0 | 15.999 | 7.364326      | 2.947546  | -1.512323  |
| 41 | O | 8.0000 | 0 | 15.999 | 2.190819      | -8.893360 | 3.763216   |
| 42 | O | 8.0000 | 0 | 15.999 | -3.565509     | -6.007430 | -8.969298  |
| 43 | O | 8.0000 | 0 | 15.999 | -6.180216     | -5.072096 | 1.236896   |
| 44 | O | 8.0000 | 0 | 15.999 | -0.395998     | -0.376263 | 7.242193   |
| 45 | O | 8.0000 | 0 | 15.999 | 8.631956      | 3.824066  | 3.685909   |
| 46 | O | 8.0000 | 0 | 15.999 | -0.631779     | 8.081441  | 0.896836   |
| 47 | O | 8.0000 | 0 | 15.999 | -6.424713     | 3.400524  | -5.100528  |
| 48 | O | 8.0000 | 0 | 15.999 | 1.734626      | 7.203860  | -8.317287  |
| 49 | O | 8.0000 | 0 | 15.999 | 11.01042<br>2 | 2.947699  | -5.524275  |
| 50 | O | 8.0000 | 0 | 15.999 | 11.23147<br>5 | -4.704798 | 0.191002   |
| 51 | O | 8.0000 | 0 | 15.999 | 4.822924      | -9.863655 | -6.441495  |
| 52 | O | 8.0000 | 0 | 15.999 | 4.611640      | -2.217451 | -12.173926 |



**Table S13** Mayer Population Analysis of POM by DFT.

| ATOM | NA      | ZA      | QA      | VA     | BVA    | FA      |
|------|---------|---------|---------|--------|--------|---------|
| 0 P  | 13.6543 | 15.0000 | 1.3457  | 4.9293 | 4.9293 | -0.0000 |
| 1 O  | 8.6307  | 8.0000  | -0.6307 | 2.0446 | 2.0446 | 0.0000  |
| 2 O  | 8.6320  | 8.0000  | -0.6320 | 2.0431 | 2.0431 | -0.0000 |
| 3 O  | 8.6320  | 8.0000  | -0.6320 | 2.0428 | 2.0428 | -0.0000 |
| 4 O  | 8.6320  | 8.0000  | -0.6320 | 2.0424 | 2.0424 | -0.0000 |
| 5 W  | 12.6857 | 14.0000 | 1.3143  | 6.4591 | 6.4591 | 0.0000  |
| 6 W  | 12.6878 | 14.0000 | 1.3122  | 6.4605 | 6.4605 | 0.0000  |
| 7 W  | 12.6857 | 14.0000 | 1.3143  | 6.4592 | 6.4592 | 0.0000  |
| 8 W  | 12.6869 | 14.0000 | 1.3131  | 6.4601 | 6.4601 | 0.0000  |
| 9 W  | 12.6860 | 14.0000 | 1.3140  | 6.4591 | 6.4591 | -0.0000 |
| 10 W | 12.6862 | 14.0000 | 1.3138  | 6.4595 | 6.4595 | 0.0000  |
| 11 W | 12.6858 | 14.0000 | 1.3142  | 6.4597 | 6.4597 | 0.0000  |
| 12 W | 12.6876 | 14.0000 | 1.3124  | 6.4611 | 6.4611 | 0.0000  |
| 13 W | 12.6880 | 14.0000 | 1.3120  | 6.4616 | 6.4616 | 0.0000  |
| 14 W | 12.6864 | 14.0000 | 1.3136  | 6.4598 | 6.4598 | -0.0000 |
| 15 W | 12.6866 | 14.0000 | 1.3134  | 6.4595 | 6.4595 | -0.0000 |
| 16 W | 12.6861 | 14.0000 | 1.3139  | 6.4592 | 6.4592 | -0.0000 |
| 17 O | 8.5618  | 8.0000  | -0.5618 | 2.2645 | 2.2645 | 0.0000  |
| 18 O | 8.5619  | 8.0000  | -0.5619 | 2.2645 | 2.2645 | -0.0000 |
| 19 O | 8.5827  | 8.0000  | -0.5827 | 2.2432 | 2.2432 | -0.0000 |
| 20 O | 8.5825  | 8.0000  | -0.5825 | 2.2432 | 2.2432 | -0.0000 |
| 21 O | 8.5612  | 8.0000  | -0.5612 | 2.2653 | 2.2653 | 0.0000  |
| 22 O | 8.5830  | 8.0000  | -0.5830 | 2.2427 | 2.2427 | -0.0000 |
| 23 O | 8.5828  | 8.0000  | -0.5828 | 2.2432 | 2.2432 | 0.0000  |
| 24 O | 8.5828  | 8.0000  | -0.5828 | 2.2429 | 2.2429 | 0.0000  |
| 25 O | 8.5829  | 8.0000  | -0.5829 | 2.2428 | 2.2428 | -0.0000 |
| 26 O | 8.5617  | 8.0000  | -0.5617 | 2.2646 | 2.2646 | 0.0000  |
| 27 O | 8.5615  | 8.0000  | -0.5615 | 2.2651 | 2.2651 | 0.0000  |
| 28 O | 8.5618  | 8.0000  | -0.5618 | 2.2646 | 2.2646 | -0.0000 |
| 29 O | 8.5832  | 8.0000  | -0.5832 | 2.2426 | 2.2426 | 0.0000  |

|      |        |        |         |        |        |         |
|------|--------|--------|---------|--------|--------|---------|
| 30 O | 8.5826 | 8.0000 | -0.5826 | 2.2432 | 2.2432 | -0.0000 |
| 31 O | 8.5827 | 8.0000 | -0.5827 | 2.2431 | 2.2431 | -0.0000 |
| 32 O | 8.5616 | 8.0000 | -0.5616 | 2.2649 | 2.2649 | 0.0000  |
| 33 O | 8.5619 | 8.0000 | -0.5619 | 2.2645 | 2.2645 | 0.0000  |
| 34 O | 8.5616 | 8.0000 | -0.5616 | 2.2649 | 2.2649 | -0.0000 |
| 35 O | 8.5827 | 8.0000 | -0.5827 | 2.2430 | 2.2430 | -0.0000 |
| 36 O | 8.5828 | 8.0000 | -0.5828 | 2.2431 | 2.2431 | 0.0000  |
| 37 O | 8.5616 | 8.0000 | -0.5616 | 2.2648 | 2.2648 | -0.0000 |
| 38 O | 8.5616 | 8.0000 | -0.5616 | 2.2648 | 2.2648 | -0.0000 |
| 39 O | 8.5618 | 8.0000 | -0.5618 | 2.2647 | 2.2647 | 0.0000  |
| 40 O | 8.5831 | 8.0000 | -0.5831 | 2.2428 | 2.2428 | -0.0000 |
| 41 O | 8.3204 | 8.0000 | -0.3204 | 2.4524 | 2.4524 | 0.0000  |
| 42 O | 8.3206 | 8.0000 | -0.3206 | 2.4519 | 2.4519 | -0.0000 |
| 43 O | 8.3205 | 8.0000 | -0.3205 | 2.4520 | 2.4520 | 0.0000  |
| 44 O | 8.3204 | 8.0000 | -0.3204 | 2.4525 | 2.4525 | 0.0000  |
| 45 O | 8.3204 | 8.0000 | -0.3204 | 2.4525 | 2.4525 | -0.0000 |
| 46 O | 8.3206 | 8.0000 | -0.3206 | 2.4518 | 2.4518 | -0.0000 |
| 47 O | 8.3205 | 8.0000 | -0.3205 | 2.4525 | 2.4525 | 0.0000  |
| 48 O | 8.3206 | 8.0000 | -0.3206 | 2.4522 | 2.4522 | 0.0000  |
| 49 O | 8.3205 | 8.0000 | -0.3205 | 2.4523 | 2.4523 | 0.0000  |
| 50 O | 8.3205 | 8.0000 | -0.3205 | 2.4521 | 2.4521 | -0.0000 |
| 51 O | 8.3205 | 8.0000 | -0.3205 | 2.4523 | 2.4523 | -0.0000 |
| 52 O | 8.3205 | 8.0000 | -0.3205 | 2.4521 | 2.4521 | -0.0000 |

NA - Mulliken gross atomic population

ZA - Total nuclear charge

QA - Mulliken gross atomic charge

VA - Mayer's total valence

BVA - Mayer's bonded valence

FA - Mayer's free valence

## Reference

1. Q. Lan, Z. M. Zhang, C. Qin, X. L. Wang, Y. G. Li, H. Q. Tan and E. B. Wang, *Chemistry–A European Journal*, 2016, **22**, 15513-15520.
2. M. Huo, W. Yang, H. Zhang, L. Zhang, J. Liao, L. Lin and C. Lu, *RSC Adv.*, 2016, **6**, 111549-111555.
3. H. Yang, J. Li, H. Zhang, Y. Lv and S. Gao, *Microporous and mesoporous materials*, 2014, **195**, 87-91.
4. J. Juan-Alcañiz, E. V. Ramos-Fernandez, U. Lafont, J. Gascon and F. Kapteijn, *Journal of Catalysis*, 2010, **269**, 229-241.
5. S. Bhattacharya, W. W. Ayass, D. H. Taffa, T. Nisar, T. Balster, A. Hartwig, V. Wagner, M. Wark and U. Kortz, *Inorg. Chem.*, 2020, **59**, 10512-10521.
6. S.-W. Li, Z. Yang, R.-M. Gao, G. Zhang and J.-s. Zhao, *Applied Catalysis B: Environmental*, 2018, **221**, 574-583.
7. J. Sun, H. S. Jena, S. Abednatanzi, Y.-Y. Liu, K. Leus and P. Van Der Voort, *ACS Applied Materials & Interfaces*, 2022, **14**, 37681-37688.
8. D. Shi, R. Zheng, C.-S. Liu, D.-M. Chen, J. Zhao and M. Du, *Inorg. Chem.*, 2019, **58**, 7229-7235.
9. Y. Song, Y. Peng, S. Yao, P. Zhang, Y. Wang, J. Gu, T. Lu and Z. Zhang, *Chinese Chemical Letters*, 2022, **33**, 1047-1050.
10. L. Zhang, T. Mi, M. A. Ziaee, L. Liang and R. Wang, *Journal of Materials Chemistry A*, 2018, **6**, 1639-1647.
11. C. M. Granadeiro, P. M. Ferreira, D. Julião, L. A. Ribeiro, R. Valença, J. C. Ribeiro, I. S. Gonçalves, B. De Castro, M. Pillinger and L. Cunha-Silva, *Energies*, 2018, **11**, 1696.
12. M. Ghahramaninezhad, F. Pakdel and M. N. Shahrak, *Polyhedron*, 2019, **170**, 364-372.
13. P. Wei, Y. Yang, W. Li and G. Li, *Fuel*, 2020, **274**, 117834.
14. J. Li, Z. Yang, G. Hu and J. Zhao, *Chemical Engineering Journal*, 2020, **388**, 124325.
15. X. S. Wang, L. Li, J. Liang, Y. B. Huang and R. Cao, *ChemCatChem*, 2017, **9**, 971-979.
16. P. Wang, L. Jiang, X. Zou, H. Tan, P. Zhang, J. Li, B. Liu and G. Zhu, *ACS applied materials & interfaces*, 2020, **12**, 25910-25919.

17. S.-W. Li, H.-Y. Zhang, T.-H. Han, W.-Q. Wu, W. Wang and J.-S. Zhao, *Separation and Purification Technology*, 2021, **264**, 118460.
